# Supplementary material for: Efficient anti-icing/deicing via photothermal-wind synergistic effects on femtosecond laser-induced superhydrophobic graphene
Source: Royal Society of Chemistry journal article supplement (doi:10.1039/d4ta06520d), 2024-11-28
Supplement: d4ta06520d1.pdf [file d4ta06520d1.pdf]

Electronic Supplementary Material (ESI) for Materials Horizons.  
This journal is © The Royal Society of Chemistry 2024

## Supplementary Information

### Efficient anti-icing/deicing via photothermal-wind synergistic effects on femtosecond laser-induced superhydrophobic graphene

Xinghao Song,<sup>a</sup> Kai Yin,<sup>\*abc</sup> Xun Li,<sup>d</sup> Lingxiao Wang,<sup>a</sup> Pengyu Yang,<sup>a</sup> Jiaqing Pei,<sup>a</sup>

Yin Huang,<sup>a</sup> Christopher J. Arnusch<sup>e</sup> and Guoqiang Li<sup>\*f</sup>

\*Corresponding to [kaiyin@csu.edu.cn](mailto:kaiyin@csu.edu.cn) (Kai Yin), [guoqli@swust.edu.cn](mailto:guoqli@swust.edu.cn) (Guoqiang Li)

Contents: Supplementary Figures S1 to S9, Supplementary Videos S1 to S5

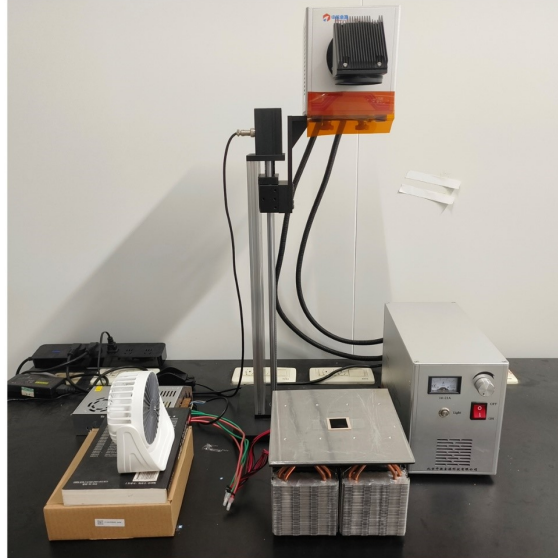

Figure S1. Optical image of the anti-icing/de-icing experimental scene.

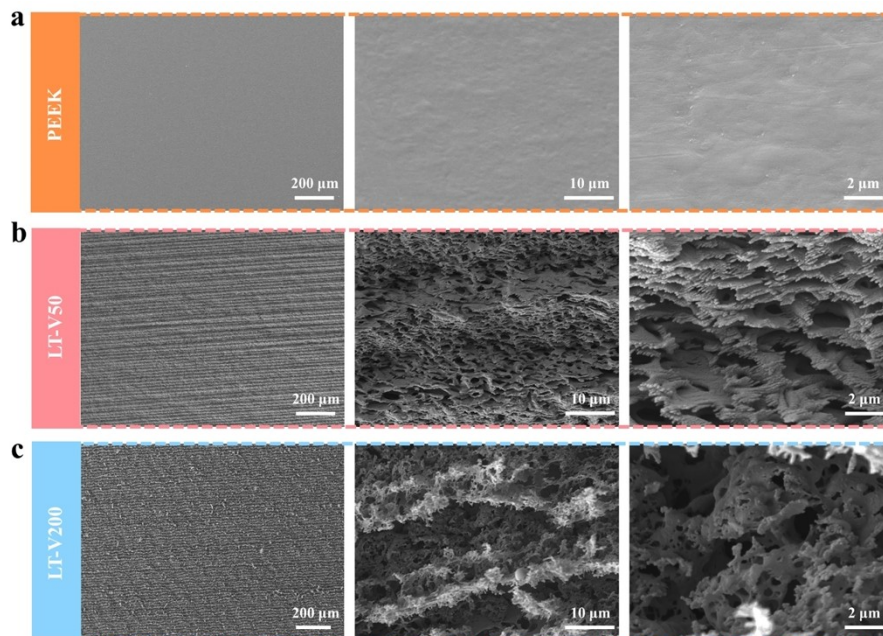

Figure S2. SEM images of (a) PEEK, (b) LT-V50, and (c) LT-V200 surfaces at different magnifications.

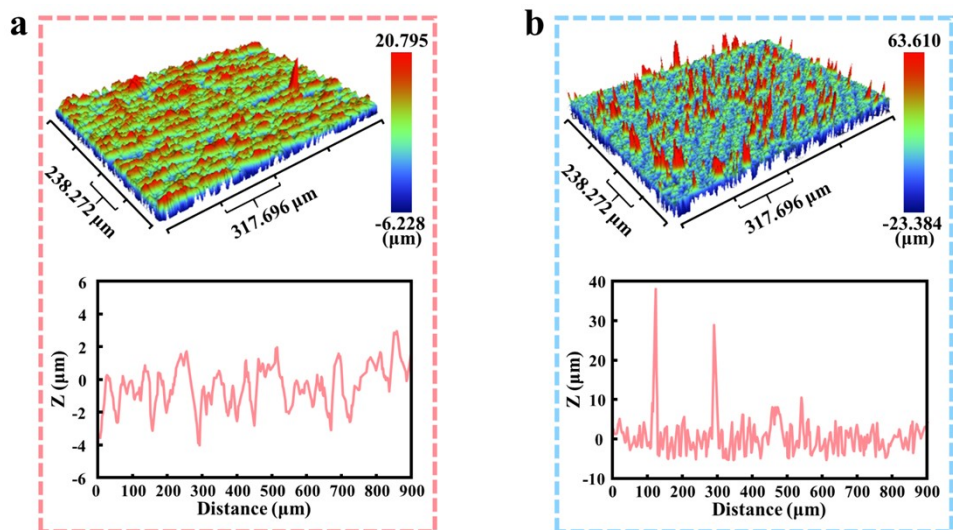

Figure S3. 3D surface morphology and cross-sectional profile images of (a) LT-V50 and (b) LT-V200.

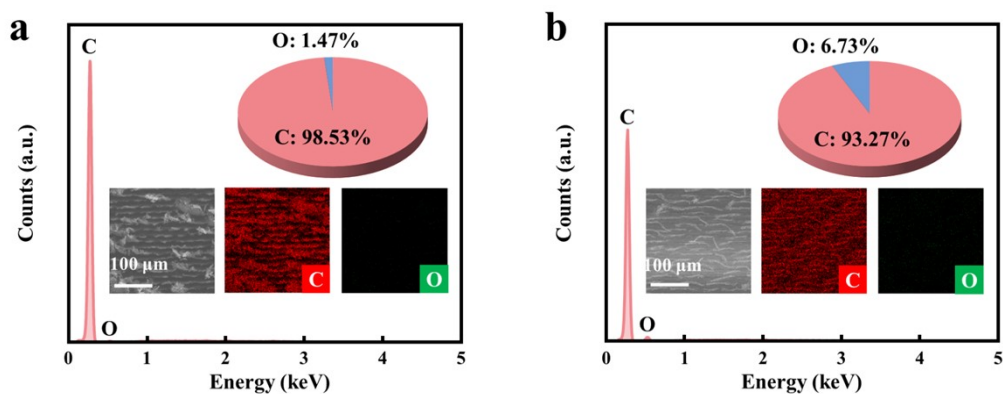

Figure S4. EDS spectrum and elemental mappings of (a) LT-V50 and (b) LT-V200.

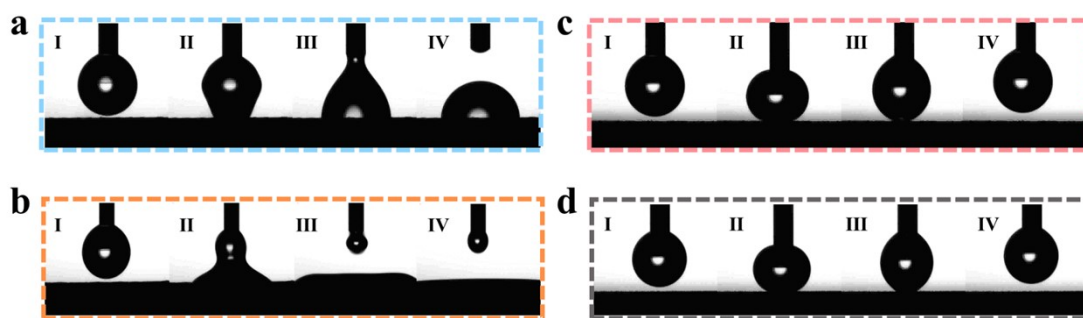

Figure S5. Dynamic adhesion test of a water droplet on the (a) PEEK, (b) LT-V50, (c) LT-V80, and (d) LT-V200, respectively.

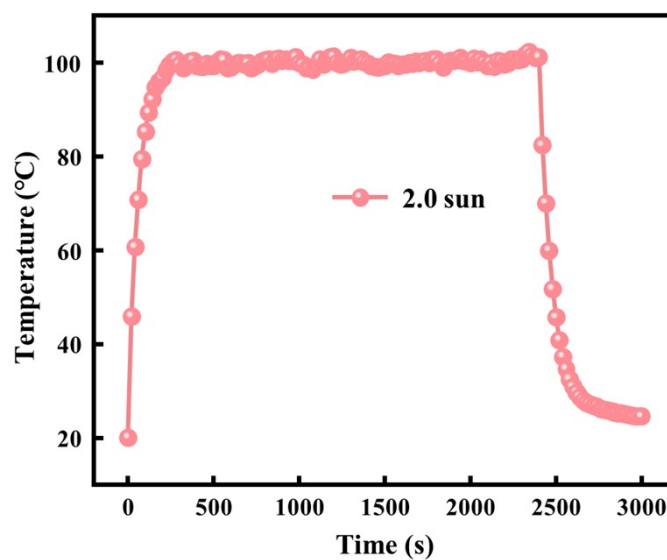

Figure S6. Photothermal stability test of LT-V80 under 2.0 sun illumination.

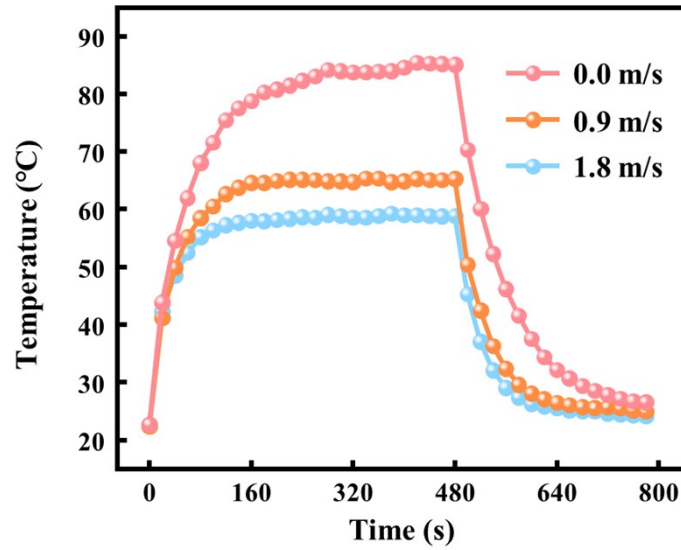

Figure S7. Surface temperature variation curves of LT-V80 under 1.5 sun illumination at different wind speeds.

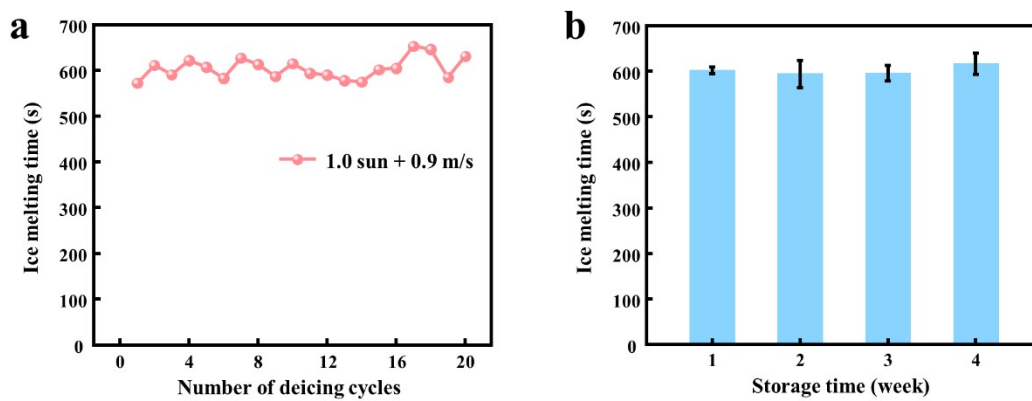

Figure S8. (a) The ice melting times on the LT-V80 surface during 20 test cycles. (b) The ice melting times on LT-V80 surfaces placed in air for 4 weeks. The experimental conditions are 1.0 sun illumination and a wind speed of 0.9 m/s.

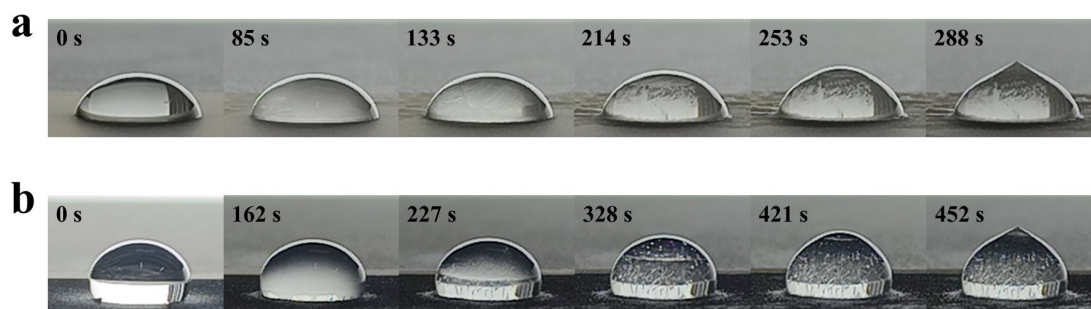

Figure S9. (a) Optical images of a water droplet (0.1 mL) freezing process on PEEK surface. (b) Optical images of a water droplet (0.1 mL) freezing process on LT-V80 surface.

Video S1. A water droplet impacting on the LT-V80 surface.

Video S2. The self-cleaning process of LT-V80 surface.

Video S3. Ice melting process under 1.0 sun illumination.

Video S4. Icing process under 0.7 sun illumination.

Video S5. The process of ice melting in outdoor environments.
